# Supplementary material
Source: PubMed Central journal article supplement (PMC3308734)
Supplement: supp_M111.247874_jbc.M111.247874-1.pdf [file supp_M111.247874_jbc.M111.247874-1.pdf]

**Supplemental FIGURE S1.** Evidence for O-glycosylation heterogeneity of the AGP31 Pro-rich domain.

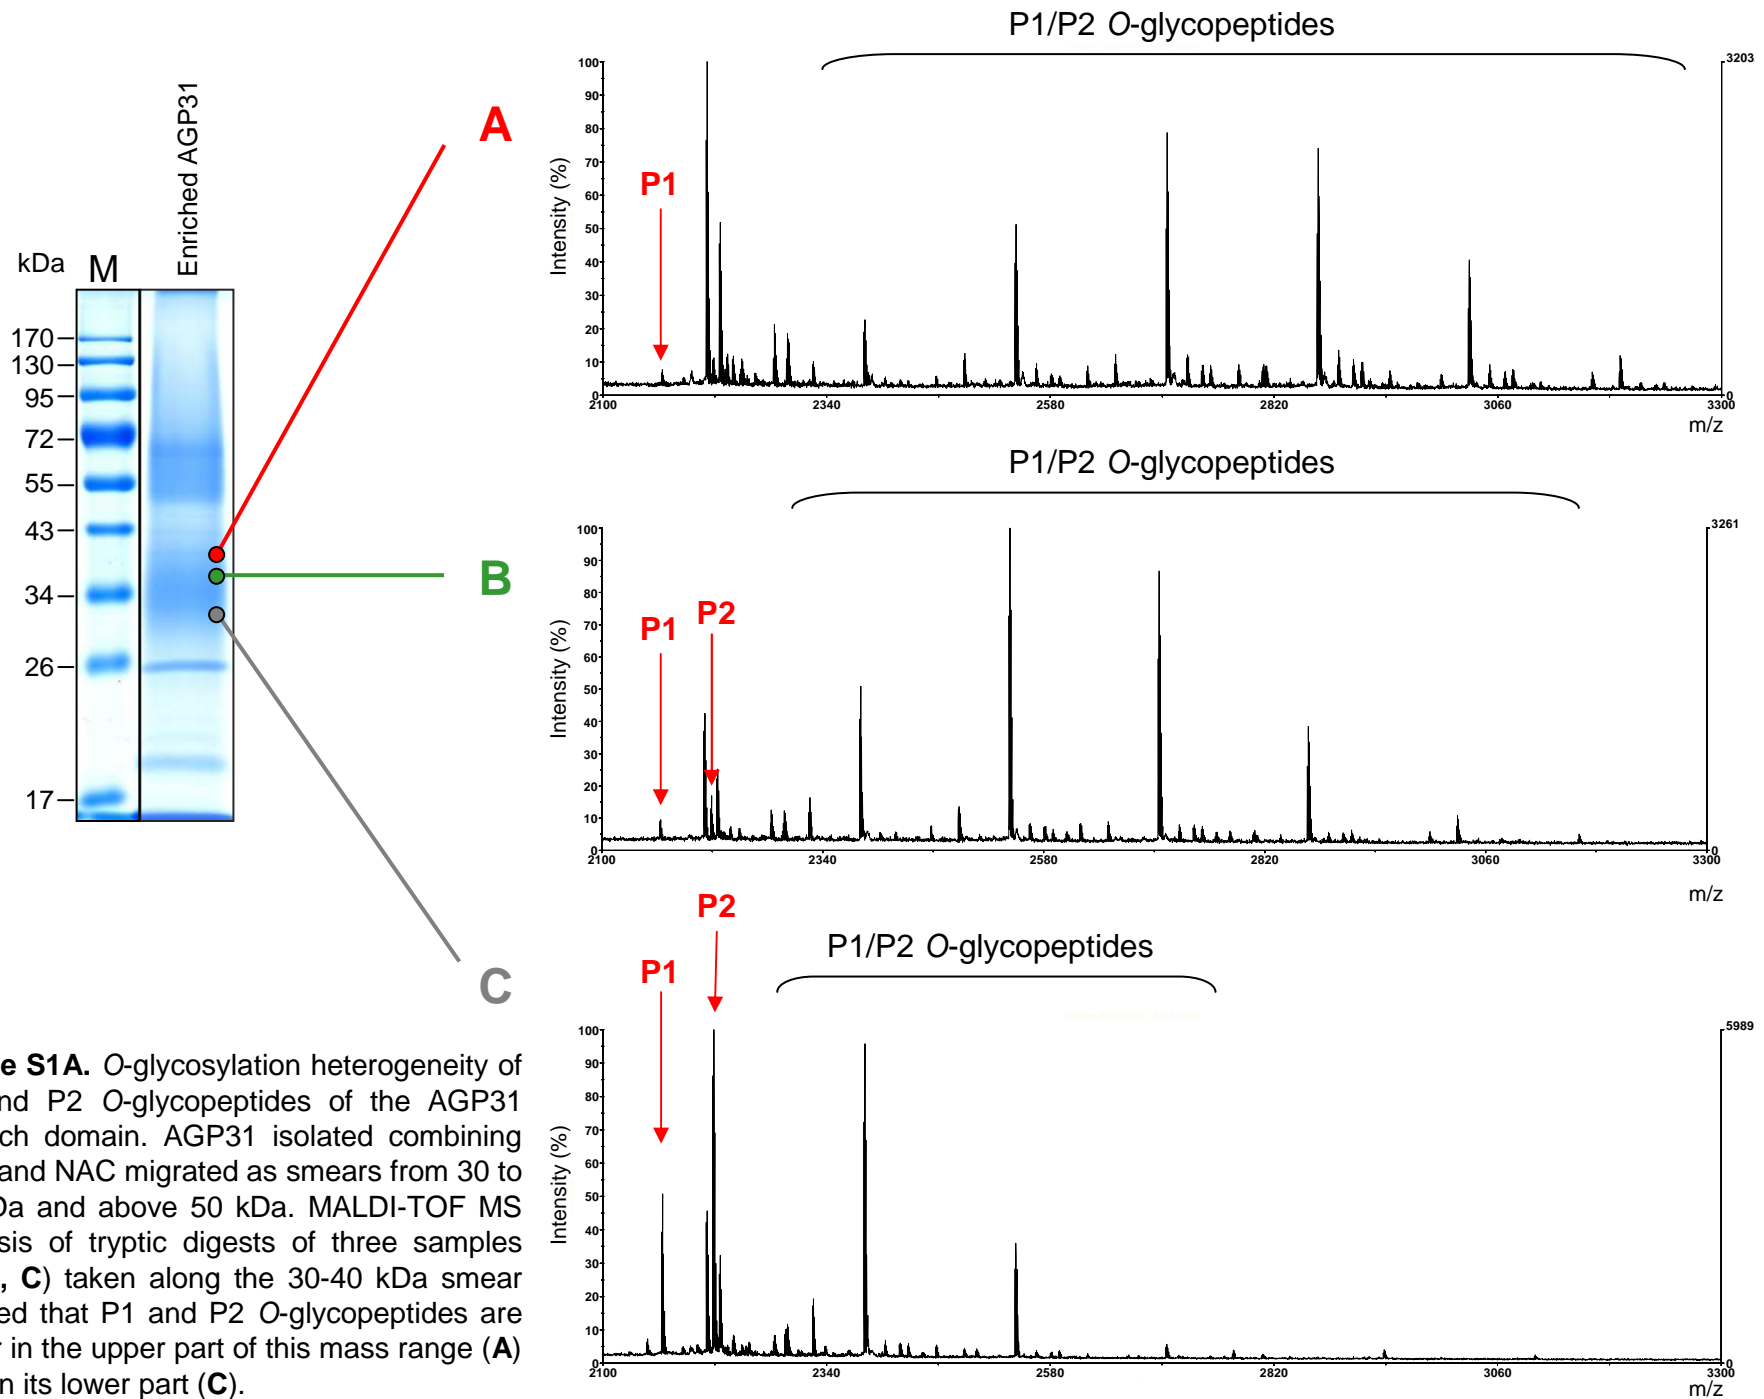

**Figure S1A.** O-glycosylation heterogeneity of P1 and P2 O-glycopeptides of the AGP31 Pro-rich domain. AGP31 isolated combining CEC and NAC migrated as smears from 30 to 40 kDa and above 50 kDa. MALDI-TOF MS analysis of tryptic digests of three samples (**A**, **B**, **C**) taken along the 30-40 kDa smear showed that P1 and P2 O-glycopeptides are larger in the upper part of this mass range (**A**) than in its lower part (**C**).

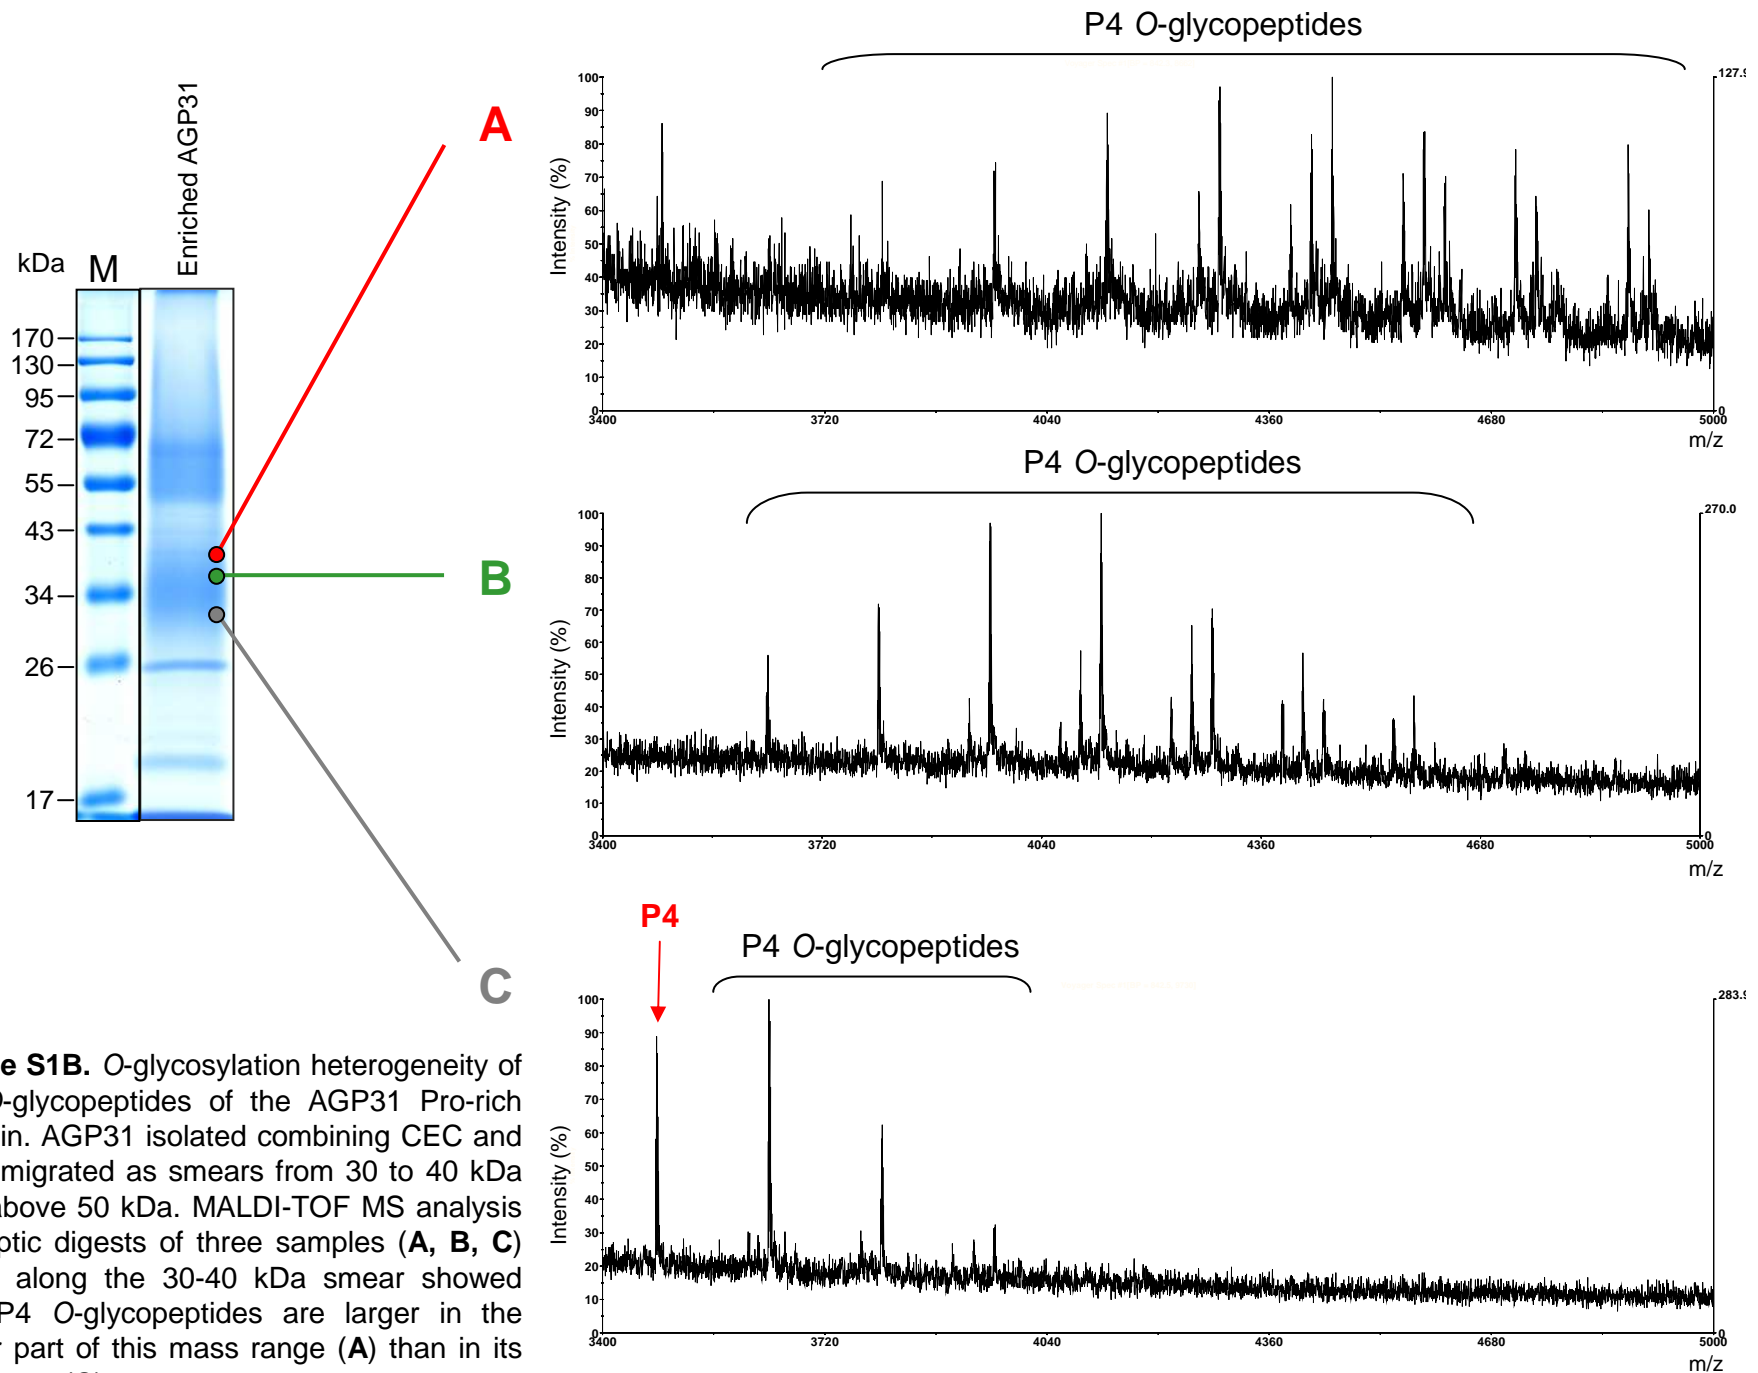

**Figure S1B.** O-glycosylation heterogeneity of P4 O-glycopeptides of the AGP31 Pro-rich domain. AGP31 isolated combining CEC and NAC migrated as smears from 30 to 40 kDa and above 50 kDa. MALDI-TOF MS analysis of tryptic digests of three samples (**A**, **B**, **C**) taken along the 30-40 kDa smear showed that P4 O-glycopeptides are larger in the upper part of this mass range (**A**) than in its lower part (**C**).
