# Supplementary material
Source: PubMed Central journal article supplement (PMC3308734)
Supplement: supp_M111.247874_jbc.M111.247874-3.pdf [file supp_M111.247874_jbc.M111.247874-3.pdf]

**Supplemental FIGURE S3.** Distribution of hexoses on AGP31 P2 O-glycopeptides using ETD MS/MS.

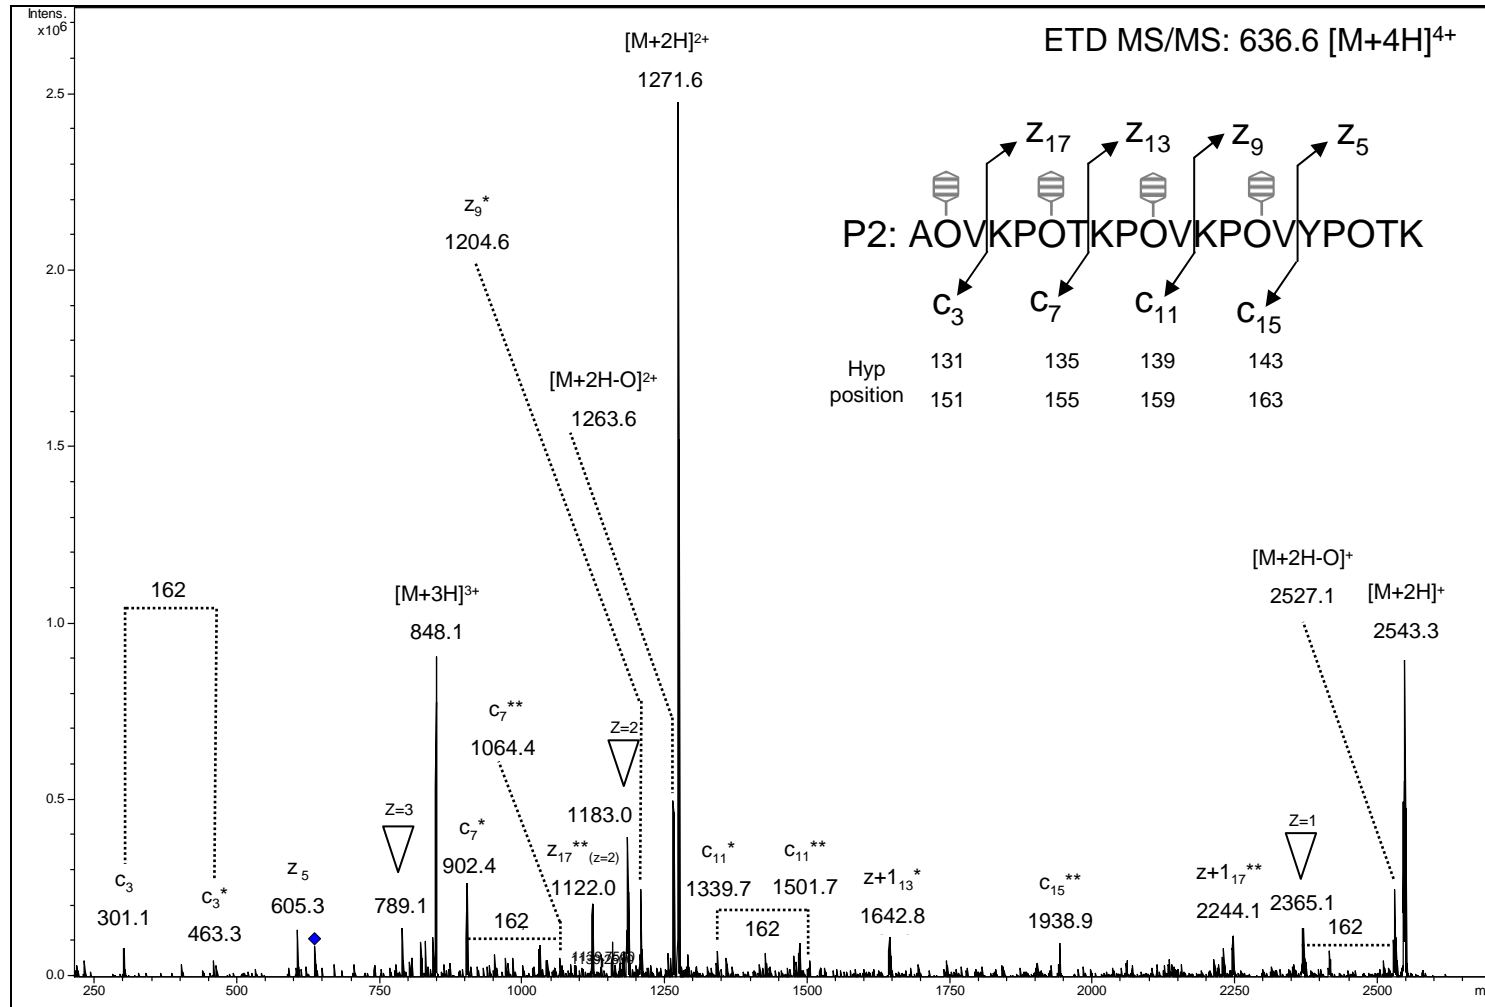

**Figure S3A. ETD MS/MS analysis of the P2 glycopeptide containing 2 hexoses (636.6 [M+4H]<sup>4+</sup>).**

For simplification, Hyp residues (O) of the P2 peptide were located according to our experimental results and literature data. Fragmentation was carried out on the P2 O-glycopeptide containing 2 hexoses obtained following gel excision of an AGP31 enriched fraction in the 50-60 kDa mass range (see Figs. 2, 3A and 4). Sites of O-glycosylation were identified from c and z series of differentially glycosylated fragment ions. The number of hexose residues (⊖) found on each fragment is indicated by stars (\*). Fragmentation pattern showed that different glycoforms exist with possible sites of O-glycosylation on Hyp131/151, Hyp135/155, Hyp139/159 and Hyp143/163 of the AGP31 Pro-rich domain. Peaks corresponding to the loss of one hexose and one hydroxyl moiety were found (▽). Parent ion fragmented is labeled with ♦.

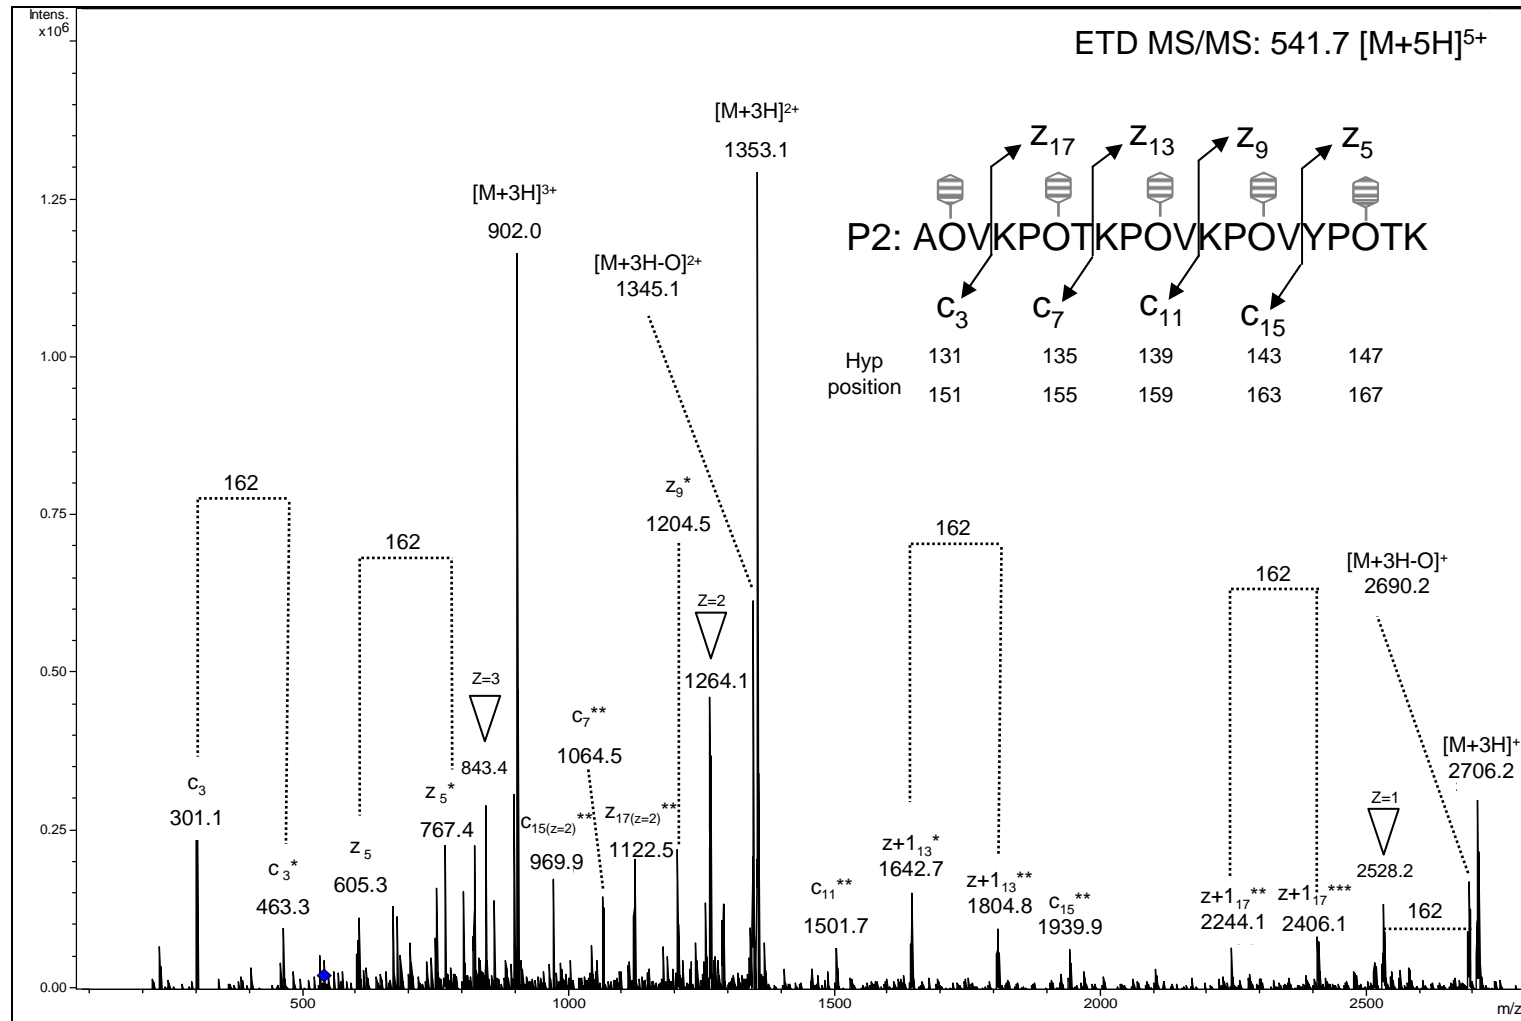

**Figure S3B. ETD MS/MS analysis of the P2 glycopeptide containing 3 hexoses (541.7 [M+5H]<sup>5+</sup>).**

For simplification, Hyp residues (O) of the P2 peptide were located according to our experimental results and literature data. Fragmentation was carried out on the P2 O-glycopeptide containing 3 hexoses obtained following gel excision of an AGP31 enriched fraction in the 50-60 kDa mass range (see Figs. 2, 3A and 4). Sites of O-glycosylation were identified from c and z series of differentially glycosylated fragment ions. The number of hexose residues (⊖) found on each fragment is indicated by stars (\*). Fragmentation pattern showed that different glycoforms exist with possible sites of O-glycosylation on Hyp131/151, Hyp135/155, Hyp139/159, Hyp143/163 and Hyp147/167 of the AGP31 Pro-rich domain. Peaks corresponding to the loss of one hexose and one hydroxyl moiety were found (▽). Parent ion fragmented is labeled with ♦.

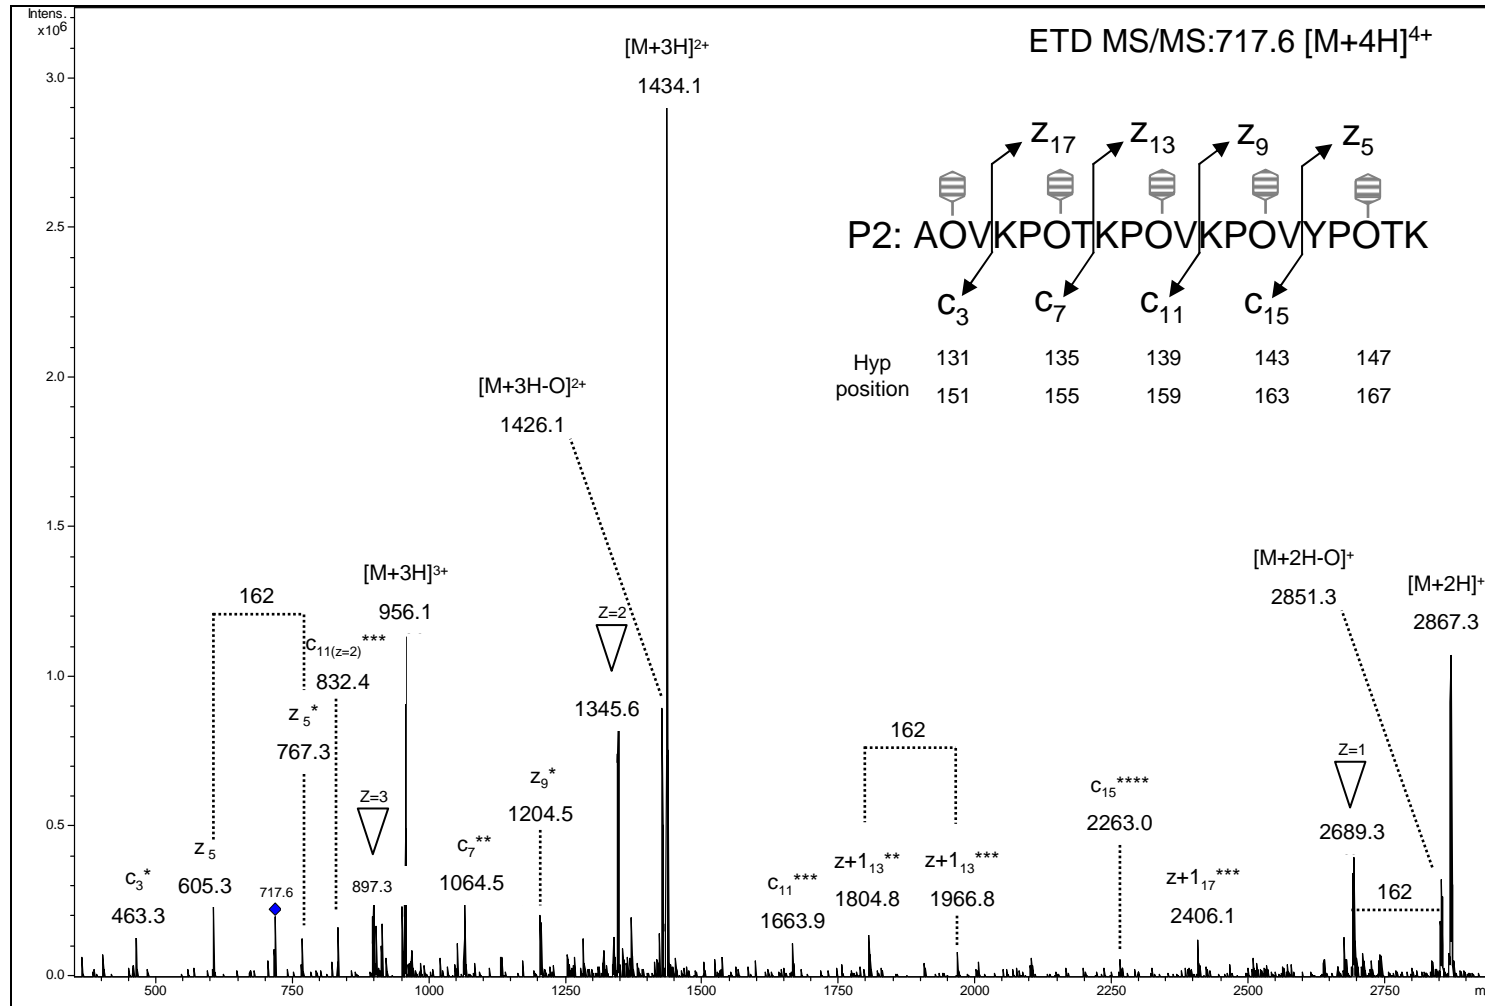

**Figure S3C. ETD MS/MS analysis of the P2 glycopeptide containing 4 hexoses (717.6 [M+4H]<sup>4+</sup>).**

For simplification, Hyp residues (O) of the P2 peptide were located according to our experimental results and literature data. Fragmentation was carried out on the P2 O-glycopeptide containing 4 hexoses obtained following gel excision of an AGP31 enriched fraction in the 50-60 kDa mass range (see Figs. 2, 3A and 4). Sites of O-glycosylation were identified from c and z series of differentially glycosylated fragment ions. The number of hexose residues (☉) found on each fragment is indicated by stars (\*). Fragmentation pattern showed that different glycoforms exist with possible sites of O-glycosylation on Hyp131/151, Hyp135/155, Hyp139/159, Hyp143/163 and Hyp147/167 of the AGP31 Pro-rich domain. Peaks corresponding to the loss of one hexose and one hydroxyl moiety were found (▽). Parent ion fragmented is labeled with ♦.

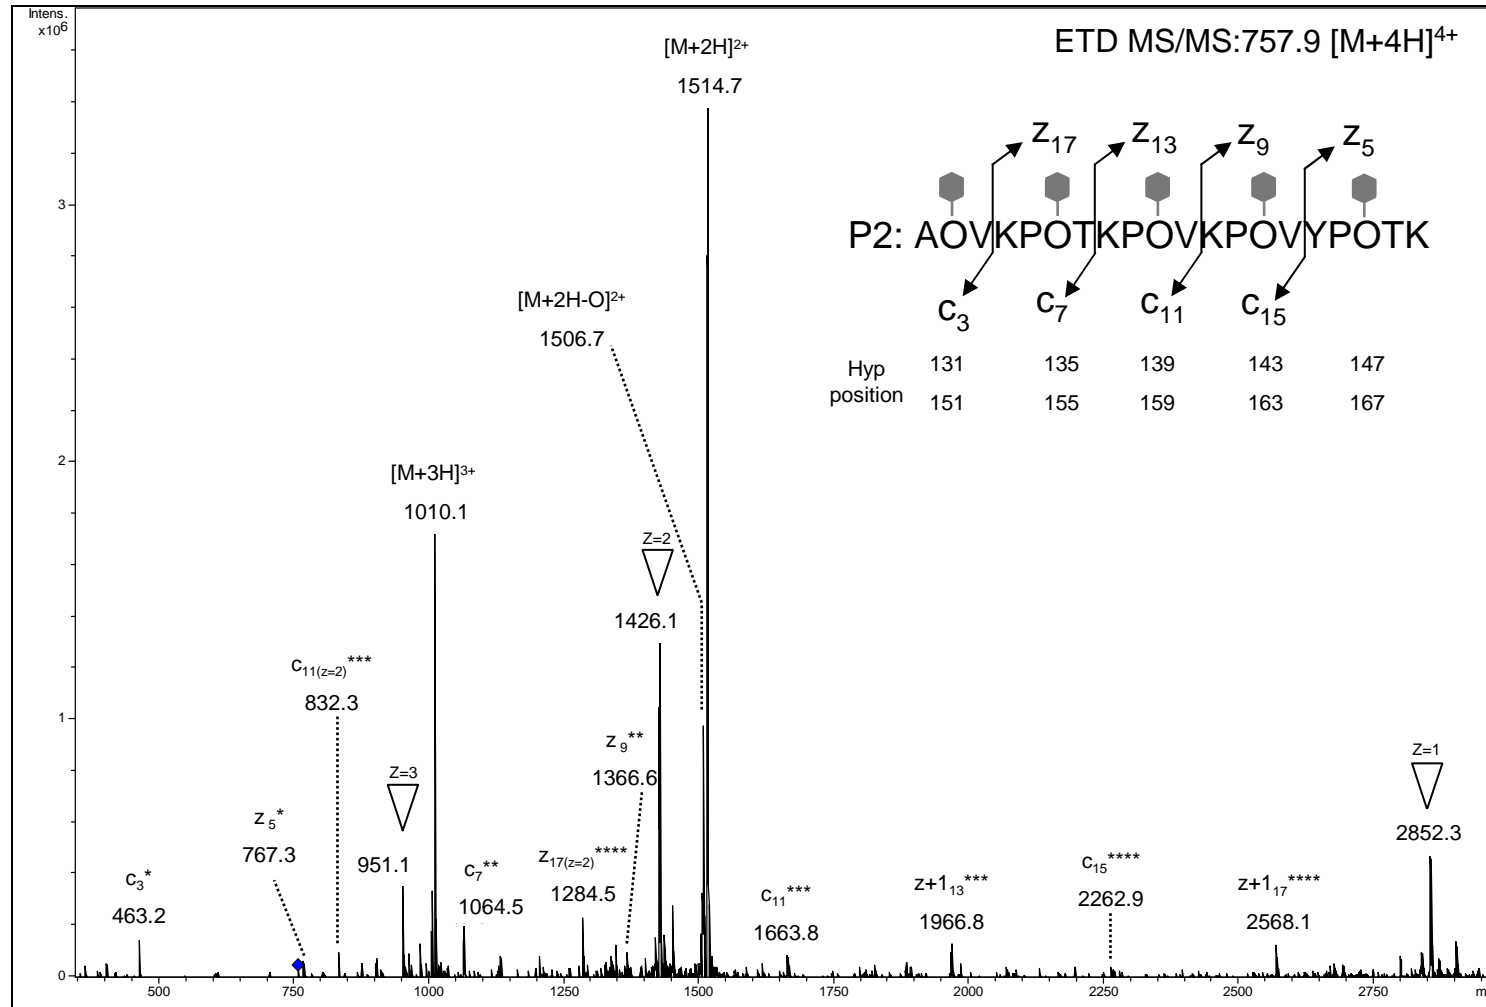

**Figure S3D. ETD MS/MS analysis of the P2 glycopeptide containing 5 hexoses (757.9 [M+4H]<sup>4+</sup>).**

For simplification, Hyp residues (O) of the P2 peptide were located according to our experimental results and literature data. Fragmentation was carried out on the P2 O-glycopeptide containing 5 hexoses obtained following gel excision of an AGP31 enriched fraction in the 50-60 kDa mass range (see Figs. 2, 3A and 4). Sites of O-glycosylation were identified from c and z series of glycosylated fragment ions. The number of hexose residues (●) found on each fragment is indicated by stars (\*). Fragmentation pattern showed that each Hyp residue of the P2 peptide of the AGP31 Pro-rich domain carries only one hexose. Peaks corresponding to the loss of one hexose and one hydroxyl moiety were found (▽). Parent ion fragmented is labeled with ◆.
